# Supplementary material
Source: Springer Nature journal article supplement (https://www.springermedizin.de/resource/supplementary/13048_2008_6_MOESM6_ESM.pdf/9664704)

**MISIIR-PTTG**

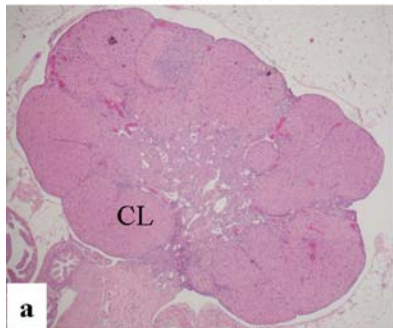

**Wild-Type**

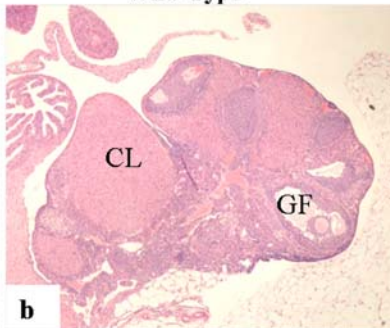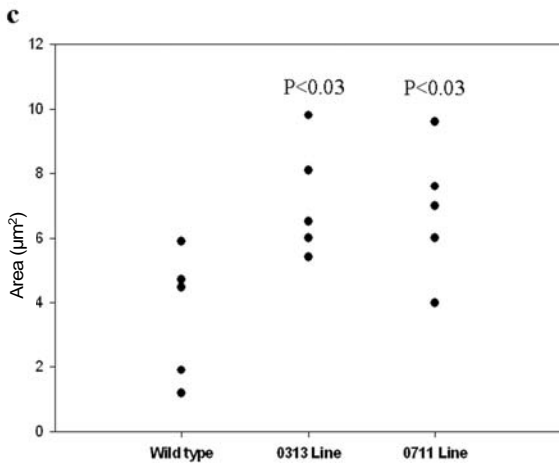

Supplement: MOESM6 [file 9664704]
